# Supplementary material for: Behavioral preventive measures and the use of medicines and herbal products among the public in response to Covid-19 in Bangladesh: A cross-sectional study
Source: PubMed Central journal article supplement (PMC7732085; doi:10.1371/journal.pone.0243706), 2020-12-11
Supplement: pone.0243706.s001.pdf [file pone.0243706.s001.pdf]

# Behavioral preventive measures and the use of medicines and herbal products among the public in response to Covid-19 in Bangladesh: A cross-sectional study

## Questionnaire- English

1. What is your age? \_\_\_\_\_
2. What is your gender?
  - a. Male
  - b. Female
3. Where is your residence?
  - a. Rural
  - b. Urban
4. What is your level of education?
  - a. SSC or below
  - b. HSC
  - c. Bachelor's degree
  - d. Master's degree or above
5. Are you married?
  - a. No
  - b. Yes
6. Do you have any chronic disease (Diabetes, Heart disease, Asthma, Cancer, Liver/Kidney disease, etc.)?
  - a. No
  - b. Yes
7. How much are you afraid of Covid-19?
  - a. Not afraid
  - b. Slightly afraid
  - c. Very afraid

8. Are you washing your hands more often than before?
  - a. No
  - b. Yes
  
9. Are you staying home more often than before?
  - a. No
  - b. Yes
  
10. Are you abstaining from visiting crowded places?
  - a. No
  - b. Yes
  
11. Do you use facemask when going outside?
  - a. No
  - b. Yes
  
12. Have there been any changes in your smoking habit?
  - a. I never smoke
  - b. There has not been any change in my smoking habit
  - c. I am smoking less than before
  - d. I am smoking more than before
  
13. Have you experienced any symptoms related to Covid-19 (fever, dry cough, difficulty breathing, tiredness, sore throat, etc.?)
  - a. No
  - b. Yes

*If the answer to question 13 is No, move to BOX 1. If YES, move to BOX 2*

BOX 1 (Answer if you have NOT experienced any symptoms related to Covid-19)

1. Have you taken any medicine as a preventive measure against Covid-19 infection /lower risk of covid-19 infection in the future?
  - a. No
  - b. Yes

If yes, which medicine? \_\_\_\_\_

2. Have you taken any herbal food/product as a preventive measure against Covid-19 infection/lower risk of covid-19 infection in the future?
  - a. No
  - b. Yes

If yes, which herbal product? \_\_\_\_\_

3. If you have taken any medicine or herbal food/product, what was the source of advice/information? (mark all that apply)
  - a. Physician
  - b. Retail pharmacist
  - c. TV/ newspaper
  - d. Facebook/twitter
  - e. Internet (Google)
  - f. Family/Friend/relative
  - g. Self-knowledge
  - h. Not applicable

BOX 2 (Answer if you have experienced any symptoms related to Covid-19)

1. If you have experienced any symptom (s) related to Covid-19, have you taken any medicine to manage that symptom (s)?

- a. No
- b. Yes

If yes, which medicine? \_\_\_\_\_

2. Did you take any medicine **before** experiencing Covid-19 related symptoms as a preventive measure against Covid-19 infection?

- a. No
- b. Yes

If yes, which medicine? \_\_\_\_\_

3. Did you take any herbal food/product before experiencing Covid-19 related symptoms as a preventive measure against Covid-19 infection?

- a. No
- b. Yes

If yes, which herbal product? \_\_\_\_\_

4. If you have taken any medicine or herbal food/product, what was the source of advice/information? (mark all that apply)

- a. Physician
- b. Retail pharmacist
- c. TV/ newspaper
- d. Facebook/twitter
- e. Internet (Google)
- f. Family/Friend/relative
- g. Self-knowledge
- h. Not applicable

## Questionnaire- Bangla

১) আপনার বয়স \_\_\_\_\_

২) আপনার লিঙ্গ-

- পুরুষ  মহিলা

৩) আপনি কোন ধরনের এলাকায় বাস করেন?

- গ্রাম  শহর

৪) আপনার শিক্ষাগত যোগ্যতা কী?

- এসএসসি বা তার নিচে  এইচএসসি  
 স্নাতক/ ব্যাচেলর ডিগ্রি  স্নাতকোত্তর/ মাস্টার্স ডিগ্রি বা তার উপরে

৫) আপনি কি বিবাহিত?

- না  হ্যাঁ

৬) আপনার কি কোনও দীর্ঘস্থায়ী/ক্রনিক রোগ রয়েছে (ডায়াবেটিস, হৃদরোগ, হাঁপানি, ক্যান্সার, লিভার/কিডনী রোগ ইত্যাদি)?

- না  হ্যাঁ

৭) আপনি কোভিড-১৯ এর ব্যাপারে কতটুকু আতঙ্কিত?

- আতঙ্কিত নই  
 কিছুটা আতঙ্কিত  
 খুবই আতঙ্কিত

৮) আপনি কি আগের চেয়ে বেশি ঘন ঘন হাত ধুচ্ছেন?

- না  হ্যাঁ

৯) আপনি কি আগের চেয়ে বেশি সময় বাড়ির ভেতর থাকছেন?

- না  হ্যাঁ

১০) আপনি কি জনবহুল স্থানে যাওয়া থেকে বিরত থাকছেন?

- না  হ্যাঁ

১১) আপনি কি ঘরের বাইরে যাওয়ার সময় ফেস মাস্ক ব্যবহার করেন?

- না  হ্যাঁ

১২) আপনার ধূমপানের অভ্যাসে কি কোনও পরিবর্তন হয়েছে?

- আমি কখনই ধূমপান করি না  
 আমি আগের মতোই ধূমপান করছি  
 আমি আগের চেয়ে কম ধূমপান করছি  
 আমি আগের চেয়ে বেশি ধূমপান করছি

১৩) আপনার শরীরে কোভিড-১৯ সম্পর্কিত কোনও লক্ষণ (জ্বর, শুকনো কাশি, শ্বাসকষ্ট, ক্লান্তি, গলা ব্যাথা বা অন্যান্য) কি ইতোমধ্যে দেখা দিয়েছে?

- না  হ্যাঁ

যদি ১৩ নম্বর প্রশ্নের উত্তর না হয়, তবে বক্স ১ পূরণ করুন, আর যদি হ্যাঁ হয়, তবে বক্স ২ পূরণ করুন।

(পরবর্তী পৃষ্ঠা)

বক্স ১ - আপনার শরীরে কোভিড-১৯ এর লক্ষণ দেখা না দিয়ে থাকলে পূরণ করুন

১) ভবিষ্যতে আপনার কোভিড-১৯ হওয়ার সম্ভাবনা / ঝুঁকি কমানোর জন্য আপনি কি কোন ওষুধ খেয়েছেন?

- না  হ্যাঁ

যদি খেয়ে থাকেন, তাহলে ওষুধের নাম লিখুন

-----

২) ভবিষ্যতে আপনার কোভিড-১৯ হওয়ার সম্ভাবনা / ঝুঁকি কমানোর জন্য আপনি কি কোনও ভেষজ/ হারবাল পণ্য খেয়েছেন?

- না  হ্যাঁ

যদি খেয়ে থাকেন, তাহলে কি খেয়েছেন?

-----

৩) আপনি যদি কোনও ওষুধ বা ভেষজ পণ্য গ্রহণ করে থাকেন তবে ওষুধ / ভেষজ পণ্য ব্যবহার সম্পর্কে পরামর্শের উৎস কী ছিল? (প্রযোজ্য সকল উত্তর চিহ্নিত করুন)

- ডাক্তার  
 ফার্মাসিস্ট  
 টিভি / সংবাদপত্র  
 ফেসবুক / টুইটার  
 ইন্টারনেট (গুগল)  
 পরিবার / বন্ধু / আত্মীয়  
 নিজস্ব জ্ঞান  
 প্রযোজ্য নয়

বক্স ২- আপনার শরীরে কোভিড-১৯ এর লক্ষণ দেখা দিয়ে থাকলে পূরণ করুন

১) আপনার শরীরে কোভিড-১৯ এর লক্ষণ দেখা যাওয়ার পর সুস্থ হওয়ার জন্য কি আপনি কোন ওষুধ খেয়েছেন?

- না  হ্যাঁ

যদি খেয়ে থাকেন, তাহলে ওষুধের নাম লিখুন - \_\_\_\_\_

২) আপনার শরীরে কোভিড-১৯ এর লক্ষণ দেখা যাওয়ার আগেই কি আপনি কোভিড-১৯ এর ঝুঁকি কমাতে কোন ওষুধ খেয়েছিলেন?

- না  হ্যাঁ

যদি খেয়ে থাকেন, তাহলে ওষুধের নাম লিখুন - \_\_\_\_\_

৩) আপনার শরীরে কোভিড-১৯ এর লক্ষণ দেখা যাওয়ার আগেই আপনি কোভিড-১৯ এর ঝুঁকি কমাতে কোনও ভেষজ/ হারবাল পণ্য খেয়েছিলেন?

- না  হ্যাঁ

যদি খেয়ে থাকেন, তাহলে কি খেয়েছেন? - \_\_\_\_\_

৪) আপনি যদি কোনও ওষুধ বা ভেষজ পণ্য গ্রহণ করে থাকেন তবে ওষুধ / ভেষজ পণ্য ব্যবহার সম্পর্কে পরামর্শের উৎস কী ছিল? (প্রযোজ্য সকল উত্তর চিহ্নিত করুন)

- ডাক্তার  
 ফার্মাসিস্ট  
 টিভি / সংবাদপত্র  
 ফেসবুক / টুইটার  
 ইন্টারনেট (গুগল)  
 পরিবার / বন্ধু / আত্মীয়  
 নিজস্ব জ্ঞান  
 প্রযোজ্য নয়
